# Supplementary material for: On the nature of Cu–carbon interaction through N-modification for enhanced ethanol synthesis from syngas and methanol
Source: Royal Society of Chemistry journal article supplement (doi:10.1039/d4cp01599a), 2024-01-01
Supplement: d4cp01599a1.pdf [file d4cp01599a1.pdf]

**Supplementary information**  
**On the nature of Cu-carbon interaction by N-modified for  
enhanced ethanol synthesis from syngas and methanol**

Mingxue Yang,<sup>a#</sup> Bing Bai,<sup>a#</sup> Hui Bai,<sup>a\*</sup> Zhongzeng Wei,<sup>a</sup> Haojie Cao,<sup>a</sup> Zhijun Zuo,<sup>a</sup> Zhihua Gao,<sup>a</sup>  
Vladimir A. Vinokurov,<sup>b</sup> Jianping Zuo,<sup>c</sup> Qiang Wang,<sup>d</sup> Wei Huang<sup>a\*</sup>

*a. State Key Laboratory of Clean and Efficient Coal Utilization, college of chemical engineering  
and technology, Taiyuan University of Technology, Taiyuan 030024, Shanxi, China*

*b. Department of Physical and Colloid Chemistry, Gubkin Russian State University of  
Oil and Gas (National Research University), Leninskiy prospect 65/1, Moscow, 119991, Russia*

*c. School of Mechanics and Civil Engineering, China University of Mining and Technology,  
Beijing 100083, China*

*d. National Key Laboratory of High Efficiency and Low Carbon Utilization of Coal, Chinese  
Academy of Sciences Institute of Coal Chemistry, Taiyuan 030001, China*

**Corresponding authors:**

Email: baihui@tyut.edu.cn; huangwei@tyut.edu.cn

# These authors contributed equally to this work.

## The details of the thermodynamic corrections

To calculate the free energy of gaseous states, we use the shomate gas equation [1]:

$$G(T) = H(T) - TS(T) \quad (a)$$

$$H(T) = E_{\text{elec}} + E_{\text{ZPE}} + \int C_p dT \quad (b)$$

$$E_{\text{ZPE}} = \frac{1}{2} \sum h_i \omega_i \quad (c)$$

$$C_p = A + B \times t + C \times t^2 + D \times t^3 - \frac{E}{t^2} \quad (d)$$

$$S = A \times \ln(t) + B \times t + \frac{C \times t^2}{2} + \frac{D \times t^3}{3} - \frac{E}{2 \times t^2} + G \quad (e)$$

From the National Institute of Standards and Technology (NIST) website, the parameters for different gas species can be obtained from A to G, and  $E_{\text{elec}}$  is the DFT energy,  $E_{\text{ZPE}}$  is the zero point energy .

In order to calculate the Gibbs free energy of adsorbates, the harmonic approximation method was used [2] :

$$G(T) = H(T) - TS(T) \quad (f)$$

$$H(T) = E_{\text{elec}} + E_{\text{ZPE}} + \sum \frac{\varepsilon_i}{e^{\varepsilon_i/k_B} - 1} \quad (g)$$

$$\varepsilon_i = h\omega_i \quad (h)$$

This equation contains four important variables: where  $\varepsilon_i$  is harmonic energy,  $\omega_i$  is angular frequency,  $k_B$  is Boltzmann constant,  $T$  is reaction temperature, and  $h$  is plank constant. As a result of the following equation, the entropy of the surface intermediate can be calculated:

$$S(T) = k_B \sum_i^{\text{harmDOF}} \frac{\varepsilon_i}{k_B T (e^{\varepsilon_i/k_B} - 1)} - \ln(1 - e^{-\varepsilon_i/k_B} - 1) \quad (i)$$

## Elementary reactions

All elementary steps involved in the microkinetic modelling for C1 and C2 products formation are listed below. Adsorption and desorption reactions are shown as  $A \rightarrow B$ . Activated reactions are described as  $A + B \leftrightarrow A-B \rightarrow AB$ . A-B represents for the transition state.

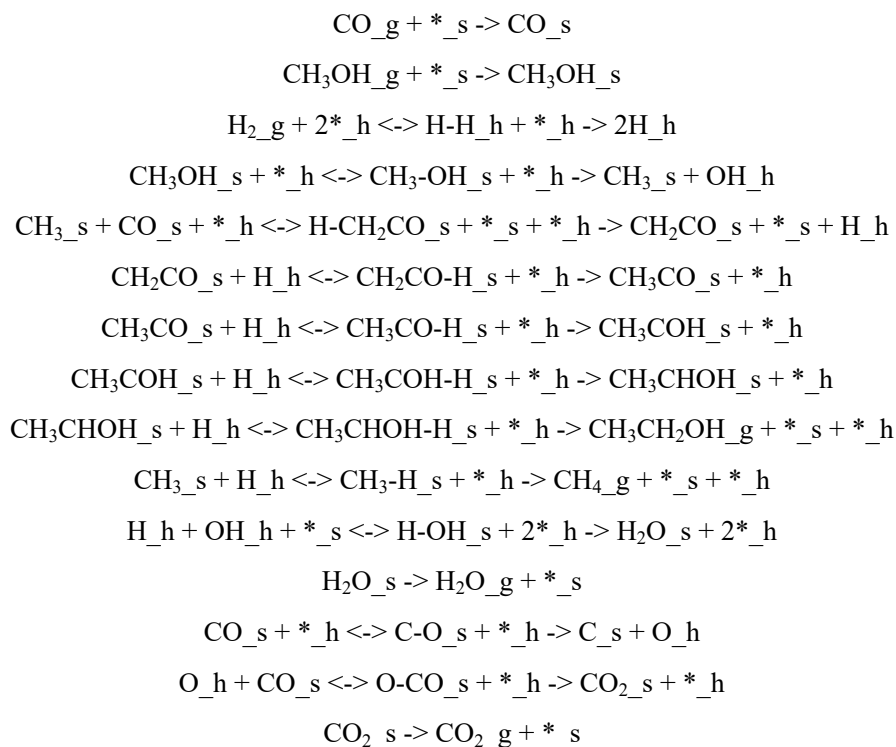

Where \*s represents the surface site, and \*h represents the hydrogen storage site.

**Table S1** Adsorption energy (eV) and key geometrical parameters (Å) of reactants, possible intermediates, and products involved in syngas conversion on the C<sub>13</sub>/Cu(111) surface.

|    | Species                          | $E_{\text{ads}}/\text{eV}$ | Configuration                                     | Key parameters/Å                                          |
|----|----------------------------------|----------------------------|---------------------------------------------------|-----------------------------------------------------------|
| 1  | H <sub>2</sub>                   | -0.31                      | <i>no bond</i>                                    | /                                                         |
| 2  | CO                               | -1.56                      | bridge C <i>via</i> C2 and Cu10                   | C2—C: 1.486; Cu10—C: 2.017                                |
| 3  | CO <sub>2</sub>                  | -1.18                      | bridge O-C-O <i>via</i> C2, Cu5, Cu9,<br>and Cu10 | C2—C: 1.507; Cu10—C: 2.228;<br>Cu5—O: 2.063; Cu9—O: 2.128 |
| 4  | H <sub>2</sub> O                 | -0.74                      | O <i>via</i> Cu9                                  | Cu9—O: 2.233                                              |
| 5  | CHO                              | -4.01                      | bridge C-O <i>via</i> C2, Cu9, and<br>Cu10        | C2—C: 1.456; Cu10—C: 2.203;<br>Cu9—O: 2.213               |
| 6  | COH                              | -4.86                      | bridge C <i>via</i> C2, Cu5, and Cu10             | C2—C: 1.470; Cu5—C: 2.050;<br>Cu10—C: 2.119               |
| 7  | CH <sub>3</sub> OH               | -0.94                      | O <i>via</i> Cu5                                  | Cu5—O: 2.156                                              |
| 8  | CH <sub>3</sub> OCH <sub>3</sub> | -0.47                      | O <i>via</i> C2                                   | C2—O: 1.606                                               |
| 9  | CH <sub>3</sub>                  | -4.71                      | C <i>via</i> C3                                   | C3—C: 1.484                                               |
| 10 | CH <sub>4</sub>                  | -0.44                      | <i>no bond</i>                                    | /                                                         |
| 11 | CH <sub>3</sub> CH <sub>3</sub>  | -0.62                      | <i>no bond</i>                                    | /                                                         |
| 12 | CH <sub>3</sub> CO               | -4.59                      | bridge C-O <i>via</i> C4 and Cu3                  | C4—C: 1.451; Cu3—O: 2.063                                 |
| 13 | CH <sub>3</sub> CHO              | -2.55                      | bridge C-O <i>via</i> C4, Cu2, and<br>Cu3         | C4—C: 1.523; Cu2—O: 1.997;<br>Cu3—O: 1.975                |
| 14 | CH <sub>3</sub> COH              | -5.40                      | C <i>via</i> C4                                   | C4—C: 1.387                                               |
| 15 | CH <sub>3</sub> CHOH             | -4.52                      | C <i>via</i> C4                                   | C4—C: 1.514                                               |
| 16 | C <sub>2</sub> H <sub>5</sub> OH | -0.99                      | O <i>via</i> Cu3                                  | Cu3—O: 2.140                                              |
| 17 | COOH                             | -4.94                      | bridge C-O <i>via</i> C3 and Cu2                  | C3—C: 1.464; Cu2—O: 2.083                                 |
| 18 | HCOOH                            | -1.56                      | bridge O-C-O <i>via</i> C3, Cu2, and<br>Cu3       | C3—C: 1.554; Cu2—O: 1.922;<br>Cu3—O: 2.173                |
| 19 | CH <sub>3</sub> COOH             | -1.22                      | bridge C-O <i>via</i> C4, Cu2, and<br>Cu3         | C4—C: 1.528; Cu2—O: 2.007;<br>Cu3—O: 1.994                |
| 20 | HOCCOOH                          | -1.46                      | bridge C-O <i>via</i> C3 and Cu2                  | C3—C: 1.536; Cu2—O: 1.917                                 |

**Table S2** The comparison of activation barriers ( $E_a$ /eV) and reaction energies ( $\Delta E$ /eV) of the key elementary reactions on the  $C_{13}$ /Cu(111), graphene/Cu(111),  $Cu_1$ /graphene, Cu(111), and Cu(211) catalysts.

| Reaction                            | $C_{13}$ /Cu(111) |                | gra/Cu(111) |                | $Cu_1$ /graphene |                | Cu(111)   |                | Cu(211)   |                |
|-------------------------------------|-------------------|----------------|-------------|----------------|------------------|----------------|-----------|----------------|-----------|----------------|
|                                     | (this work)       |                | (Ref.17)    |                | (Ref.15)         |                | (Ref.59)  |                | (Ref.58)  |                |
|                                     | $E_a$ /eV         | $\Delta E$ /eV | $E_a$ /eV   | $\Delta E$ /eV | $E_a$ /eV        | $\Delta E$ /eV | $E_a$ /eV | $\Delta E$ /eV | $E_a$ /eV | $\Delta E$ /eV |
| $CH_3OH \rightarrow CH_3 + OH$      | 0.61              | -1.89          | /           | /              | 0.52             | -0.04          | /         | /              | 1.73      | -0.22          |
| $CH_3 + CHO \rightarrow CH_3CHO$    | /                 | /              | 0.92        | -0.64          | 0.51             | -1.15          | 0.51      | -1.04          | 0.91      | -0.94          |
| $CH_3 + CO \rightarrow CH_2CO + H$  | 1.05              | 0.26           | /           | /              | /                | /              | /         | /              | /         | /              |
| $CH_3CHOH + H \rightarrow C_2H_5OH$ | 3.19              | 2.78           | 0.15        | -1.05          | 1.98             | -0.58          | /         | /              | /         | /              |
| $H + OH \rightarrow H_2O$           | 1.09              | 0.88           | 1.16        | 0.29           | /                | /              | 1.18      | -0.21          | /         | /              |
| $CO + O \rightarrow CO_2$           | 1.54              | 0.46           | 0.66        | -0.34          | /                | /              | 0.65      | -1.12          | /         | /              |
| $CH_3 + H \rightarrow CH_4$         | 4.08              | 2.50           | 0.59        | -0.04          | 0.54             | -0.78          | 0.80      | -0.67          | 1.34      | -0.23          |

**Fig S1** Optimized configurations of three carbon skeletons of (a) phenalenyl, (b) anthracene, and (c) phenanthrene as different graphene fragments loaded on the Cu(111) surface. Calculated Bader charge of carbon atoms and its surrounding Cu atoms are labeled.

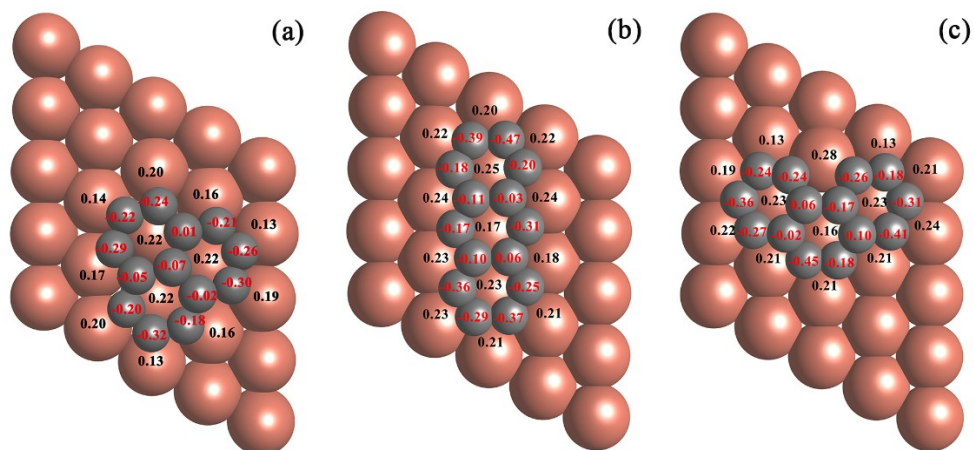

**Fig. S2** Top and side views of the most stable adsorption configurations of possible species involved in syngas conversion over  $C_{13}/Cu(111)$  catalyst. Red and white spheres represent O and H atoms, respectively.

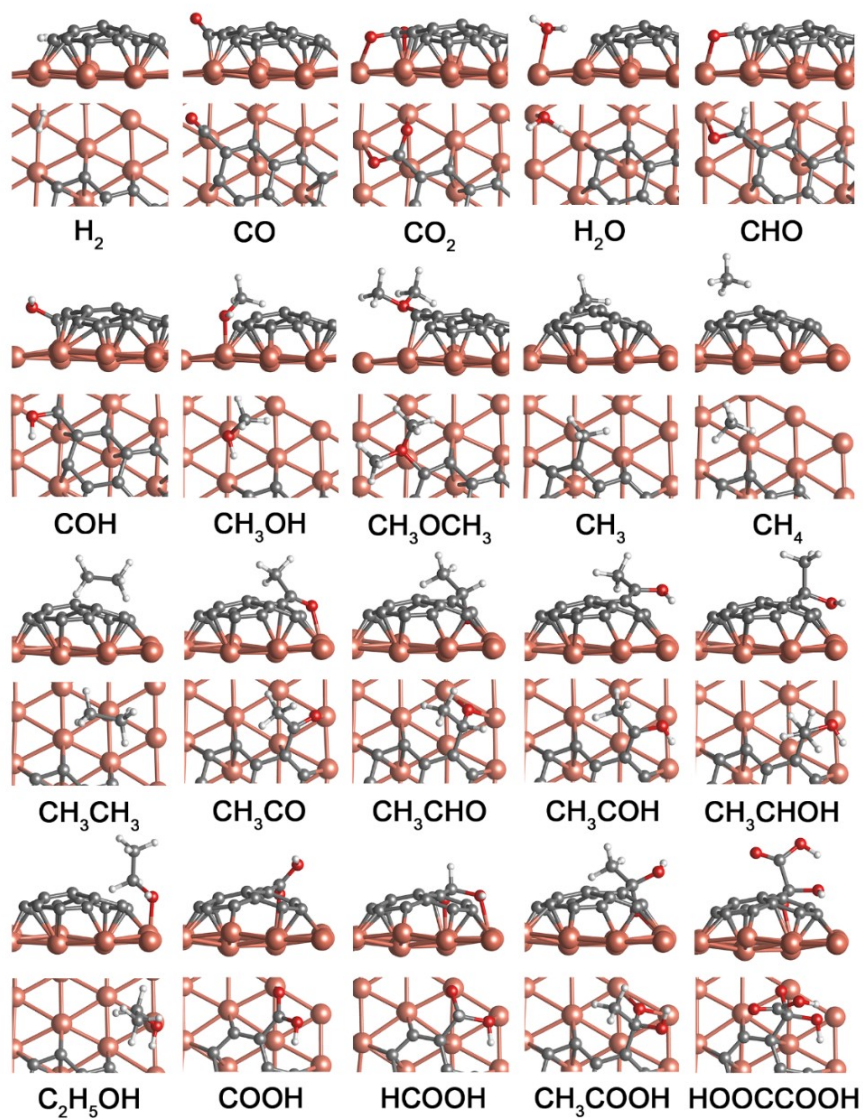

**Fig. S3** The structures of IS TS and FS in the other possible competitive pathways in Fig. 3.

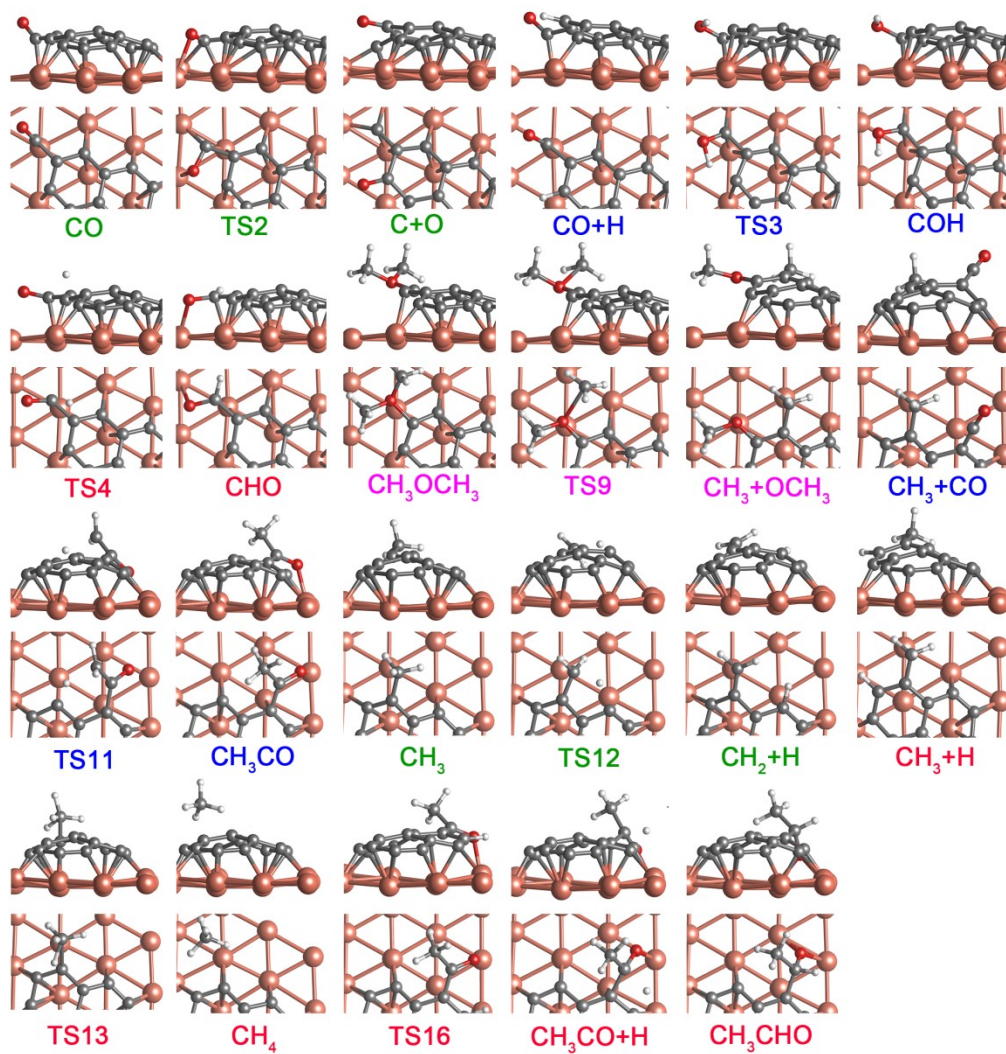



**Fig. S4** Simulated STM images for the closed-shell (a)  $C_{13}/Cu(111)$  and (b)  $C_{11}N_2/Cu(111)$  systems at a bias of  $V=-0.6$  V. The wireframe structures are overlapped to the simulated STM images.

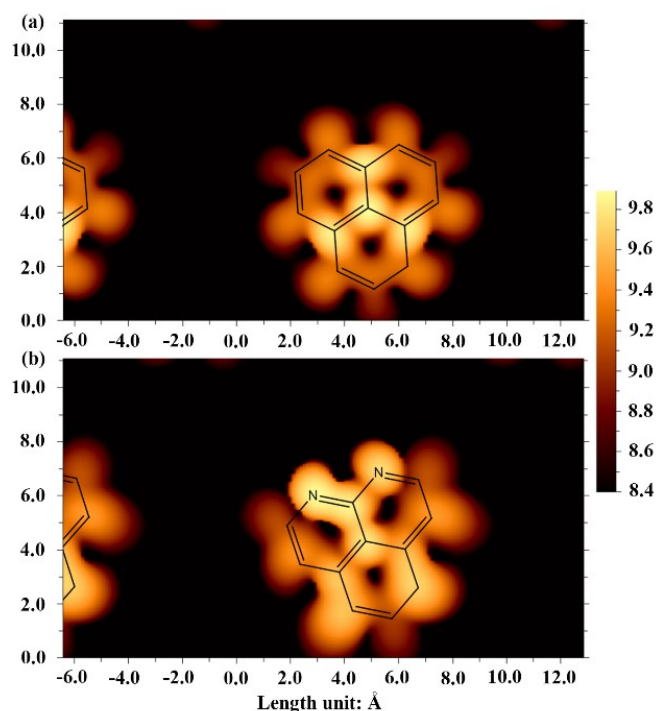

Based on the Tersoff–Hamann approximation[3], we further simulated the STM images in the Fig. S4 for the closed-shell  $C_{13}/Cu(111)$  and  $C_{11}N_2/Cu(111)$  catalyst models by the Multiwfn software[4]. The STM tip is scanned above the measured  $C_{13}/Cu(111)$  and  $C_{11}N_2/Cu(111)$  catalysts. When the catalyst is close enough to the tip and a bias voltage ( $V$ ) is applied, tunneling current ( $I$ ) is formed between them due to the tunneling effect. STM image is formed according to the  $I(x,y,z)$  function, so  $I$  is different when the tip is in different positions. When  $V$  is negative, electrons flow from the catalyst to the tip, and when  $V$  is positive, electrons flow from the tip to the catalyst.

Here the images were obtained at a negative bias  $V = -0.6$  V which had been used in the STM experiment for the synthesized unsubstituted phenalenyl radical on  $Au(111)$  surface.<sup>27</sup> The bright features because of the obvious tunneling current in the simulated STM image are associated to the  $C_{13}$  and  $C_{11}N_2$  fragments, while the dark features due to negligible tunneling current correspond to the  $Cu(111)$  surfaces. Note that in Fig. 9 the orange color of four C atoms in the center of  $C_{13}$  is brighter, however, the color of

four atoms including two N and two C atom at the edge of  $C_{11}N_2$  is brighter, both of the brighter regions are associate with higher electron density. The simulated STM images could provide a support in favor of experimental synthesis of N-doped graphene fragment on the metal surface in the future.

### References:

---

- [1] P. Atkins and J. De Paula, *Atkins' Physical Chemistry*, 2006.
- [2] E.B. Wilson, J.C. Decius and P.C. Cross, *Molecular Vibrations: The Theory of Infrared and Raman Vibrational Spectra*, Dover Publications, 1980.
- [3] J. Tersoff and D. R. Hamann, *Phys. Rev. Lett.*, 1983, 50, 1998–2001.
- [4] T. Lu and F. Chen, *J. Comput. Chem.*, 2012, 33, 580–592.
